# Supplementary material for: Clinical Characteristics of Exacerbation-Prone Adult Asthmatics Identified by Cluster Analysis
Source: PubMed Central journal article supplement — Allergy Asthma Immunol Res. 2017 Aug 8;9(6):483–90. doi: 10.4168/aair.2017.9.6.483 (PMC5603476; doi:10.4168/aair.2017.9.6.483), 2017-08-08
Supplement: aair-9-483-s001.pdf [file aair-9-483-s001.pdf]

**Supplementary Table S1.** Pair-wise comparisons of the first (A) and the second (B) exacerbations among the four clusters (A)

| Cluster               | 1           |        | 2           |       | 3           |        | 4           |      |
|-----------------------|-------------|--------|-------------|-------|-------------|--------|-------------|------|
|                       | Chi-squared | Sig.   | Chi-squared | Sig.  | Chi-squared | Sig.   | Chi-squared | Sig. |
| Log rank (Mantel-Cox) | 1           |        | 2.538       | .111  | 17.569      | .000   | 1.339       | .247 |
|                       | 2           | 2.538  | .111        |       | 3.038       | .081   | 1.159       | .282 |
|                       | 3           | 17.569 | .000        | 3.038 | .081        |        | 12.664      | .000 |
|                       | 4           | 1.339  | .247        | 1.159 | .282        | 12.664 | .000        |      |

(B)

| Cluster               | 1           |       | 2           |       | 3           |       | 4           |      |
|-----------------------|-------------|-------|-------------|-------|-------------|-------|-------------|------|
|                       | Chi-squared | Sig.  | Chi-squared | Sig.  | Chi-squared | Sig.  | Chi-squared | Sig. |
| Log rank (Mantel-Cox) | 1           |       | 3.826       | .050  | 7.568       | .006  | 0.282       | .595 |
|                       | 2           | 3.826 | .050        |       | 0.001       | .974  | 2.336       | .126 |
|                       | 3           | 7.568 | .006        | 0.001 | .974        |       | 4.602       | .032 |
|                       | 4           | 0.282 | .595        | 2.336 | .126        | 4.602 | .032        |      |
