# Supplementary material for: Clinical Characteristics of Exacerbation-Prone Adult Asthmatics Identified by Cluster Analysis
Source: PubMed Central journal article supplement — Allergy Asthma Immunol Res. 2017 Aug 8;9(6):483–90. doi: 10.4168/aair.2017.9.6.483 (PMC5603476; doi:10.4168/aair.2017.9.6.483), 2017-08-08
Supplement: aair-9-483-s002.pdf [file aair-9-483-s002.pdf]

**Supplementary Table S2.** Correlation coefficients between the variables.

| Spearman's rho | Sex                 | Sex               | Age                | Duration of asthma | Amount of smoking | FEV1%              | BMI               | PC20               | Atopy              | Eosinophil        | Age at asthma onset | Total IgE (%)     | ΔFEV1%             |
|----------------|---------------------|-------------------|--------------------|--------------------|-------------------|--------------------|-------------------|--------------------|--------------------|-------------------|---------------------|-------------------|--------------------|
|                | Sex                 | 1.000             | -.111              | .047               | .332 <sup>†</sup> | -.041              | .090              | .024               | .094               | .166 <sup>†</sup> | -.086               | .068              | .025               |
|                | Age                 | .259              | .074               | .449               | .000              | .509               | .148              | .703               | .132               | .009              | .170                | .283              | .697               |
|                | Duration of asthma  | -.111             | 1.000              | .259               | .259              | .259               | .324 <sup>†</sup> | .257               | .259               | .249              | .259                | .249              | .254               |
|                | Amount of smoking   | .074              | .259               | .113               | -.019             | -.054              | .000              | .071               | -.265 <sup>†</sup> | -.081             | .705 <sup>†</sup>   | -.088             | .069               |
|                | FEV1%               | .259              | .074               | .070               | .756              | .384               | .000              | .260               | .000               | .204              | .000                | .167              | .271               |
|                | BMI                 | .259              | .259               | .259               | .052              | .042               | .041              | .129 <sup>*</sup>  | .259               | .249              | .259                | .249              | .254               |
|                | PC20                | .047              | .113               | 1.000              | .401              | .502               | .510              | .038               | .660               | .760              | .898                | .358              | .828               |
|                | Atopy               | .449              | .070               | .259               | .259              | .259               | .259              | .257               | .259               | .249              | .259                | .249              | .254               |
|                | Eosinophil (%)      | .259              | .259               | .052               | 1.000             | -.091              | .081              | .006               | .123 <sup>*</sup>  | .100              | .016                | .010              | -.014              |
|                | Age at asthma onset | .332 <sup>†</sup> | -.019              | .042               | .401              | .144               | .194              | .917               | .048               | .115              | .792                | .880              | .828               |
|                | Total IgE           | .000              | .756               | .259               | .259              | 1.000              | .038              | .160 <sup>*</sup>  | -.075              | -.031             | .065                | -.048             | -.231 <sup>†</sup> |
|                | ΔFEV1%              | .259              | -.054              | .042               | .259              | .259               | .541              | .010               | .228               | .629              | .296                | .455              | .000               |
|                |                     | .259              | .384               | .502               | .144              | .259               | .259              | .257               | .259               | .249              | .259                | .249              | .254               |
|                |                     | .090              | .324 <sup>†</sup>  | .041               | .081              | .038               | 1.000             | .079               | .021               | -.058             | .227 <sup>†</sup>   | .029              | .046               |
|                |                     | .148              | .000               | .510               | .194              | .541               | .259              | .208               | .740               | .359              | .000                | .648              | .462               |
|                |                     | .259              | .259               | .259               | .259              | .259               | .259              | .257               | .259               | .249              | .259                | .249              | .254               |
|                |                     | .024              | .071               | -.129 <sup>*</sup> | .006              | .160 <sup>*</sup>  | .079              | 1.000              | -.059              | -.118             | .140 <sup>*</sup>   | -.059             | -.212 <sup>†</sup> |
|                |                     | .703              | .038               | .042               | .917              | .010               | .208              | .257               | .344               | .064              | .025                | .355              | .001               |
|                |                     | .257              | .257               | .257               | .257              | .257               | .257              | .257               | .257               | .247              | .257                | .247              | .252               |
|                |                     | .094              | -.265 <sup>†</sup> | -.027              | .123 <sup>*</sup> | -.075              | .021              | -.059              | 1.000              | .074              | -.197 <sup>†</sup>  | .413 <sup>†</sup> | -.049              |
|                |                     | .132              | .000               | .660               | .048              | .228               | .740              | .344               | .259               | .246              | .001                | .000              | .436               |
|                |                     | .259              | .259               | .259               | .259              | .259               | .259              | .257               | .259               | .249              | .259                | .249              | .254               |
|                |                     | .166 <sup>†</sup> | -.081              | .019               | .100              | -.031              | -.058             | -.118              | .074               | 1.000             | .049                | .200 <sup>†</sup> | .058               |
|                |                     | .009              | .204               | .760               | .115              | .629               | .359              | .064               | .246               | .249              | .440                | .002              | .366               |
|                |                     | .249              | .249               | .249               | .249              | .249               | .249              | .247               | .249               | .249              | .249                | .239              | .245               |
|                |                     | -.086             | .705 <sup>†</sup>  | .008               | .016              | .065               | .227 <sup>†</sup> | .140 <sup>*</sup>  | -.197 <sup>†</sup> | .049              | 1.000               | -.046             | -.035              |
|                |                     | .170              | .000               | .898               | .792              | .296               | .000              | .025               | .001               | .440              | .474                | .474              | .574               |
|                |                     | .259              | .259               | .259               | .259              | .259               | .259              | .257               | .259               | .249              | .259                | .249              | .254               |
|                |                     | .068              | -.088              | -.058              | .010              | -.048              | .029              | -.059              | .413 <sup>†</sup>  | .200 <sup>†</sup> | -.046               | 1.000             | .001               |
|                |                     | .283              | .167               | .358               | .880              | .455               | .648              | .355               | .000               | .002              | .474                | .474              | .574               |
|                |                     | .249              | .249               | .249               | .249              | .249               | .249              | .247               | .249               | .239              | .249                | .249              | .245               |
|                |                     | .025              | .069               | .014               | -.014             | -.231 <sup>†</sup> | .046              | -.212 <sup>†</sup> | -.049              | .058              | -.035               | .001              | 1.000              |
|                |                     | .697              | .271               | .828               | .828              | .000               | .462              | .001               | .436               | .366              | .574                | .993              | .245               |
|                |                     | .254              | .254               | .254               | .254              | .254               | .254              | .252               | .254               | .245              | .254                | .245              | .254               |

\*Correlation is significant at the 0.05 level (2-tailed), <sup>†</sup>Correlation is significant at the 0.01 level (2-tailed). Spearman's correlation coefficients were calculated.
