# Supplementary material for: Clinical Characteristics of Exacerbation-Prone Adult Asthmatics Identified by Cluster Analysis
Source: PubMed Central journal article supplement — Allergy Asthma Immunol Res. 2017 Aug 8;9(6):483–90. doi: 10.4168/aair.2017.9.6.483 (PMC5603476; doi:10.4168/aair.2017.9.6.483), 2017-08-08
Supplement: aair-9-483-s003.pdf [file aair-9-483-s003.pdf]

**Supplementary Table S3.** Cox's regression analysis of variables from the first attack (A) to the second attack (B)

|                            | B        | SE       | Wald   | df | Sig.     | Exp (B) | 95.0% CI for Exp (B) |       |
|----------------------------|----------|----------|--------|----|----------|---------|----------------------|-------|
|                            |          |          |        |    |          |         | Lower                | Upper |
| Sex                        | -0.083   | 0.187    | 0.194  | 1  | 0.659    | 0.921   | 0.638                | 1.329 |
| Age                        | 0.002    | 0.008    | 0.043  | 1  | 0.836    | 1.002   | 0.986                | 1.017 |
| Duration of asthma         | -0.139   | 0.023    | 37.49  | 1  | 9.19E-10 | 0.87    | 0.832                | 0.91  |
| Amount of smoking          | 0.054    | 0.059    | 0.833  | 1  | 0.361    | 1.055   | 0.94                 | 1.185 |
| FEV1%                      | -0.022   | 0.005    | 16.823 | 1  | 4.10E-05 | 0.978   | 0.967                | 0.988 |
| BMI                        | 0.016    | 0.021    | 0.563  | 1  | 0.453    | 1.016   | 0.975                | 1.059 |
| PC20                       | 0.006    | 0.008    | 0.467  | 1  | 0.494    | 1.006   | 0.989                | 1.023 |
| Atopy                      | 0.149    | 0.154    | 0.947  | 1  | 0.33     | 1.161   | 0.859                | 1.569 |
| Blood eosinophil (% , log) | 0.009    | 0.012    | 0.52   | 1  | 0.471    | 1.009   | 0.985                | 1.032 |
| ΔFEV1                      | -0.009   | 0.007    | 1.486  | 1  | 0.223    | 0.991   | 0.977                | 1.006 |
| Age at asthma onset        | -0.002   | 0.008    | 0.055  | 1  | 0.815    | 0.998   | 0.983                | 1.014 |
| Total IgE (KU/L, log)      | 1.43E-04 | 1.61E-04 | 0.795  | 1  | 0.373    | 1       | 1                    | 1     |
| Cluster1                   |          |          | 2.436  | 3  | 0.487    |         |                      |       |
| Cluster2                   | -0.26    | 0.36     | 0.52   | 1  | 0.471    | 0.771   | 0.38                 | 1.563 |
| Cluster3                   | -0.089   | 0.303    | 0.086  | 1  | 0.769    | 0.915   | 0.506                | 1.656 |
| Cluster4                   | 0.142    | 0.26     | 0.299  | 1  | 0.584    | 1.153   | 0.692                | 1.921 |

(B)

|                            | B         | SE       | Wald   | df | Sig.     | Exp (B) | 95.0% CI for Exp (B) |       |
|----------------------------|-----------|----------|--------|----|----------|---------|----------------------|-------|
|                            |           |          |        |    |          |         | Lower                | Upper |
| Sex                        | -0.168    | 0.251    | 0.45   | 1  | 0.502    | 0.845   | 0.517                | 1.381 |
| Age                        | 0.001     | 0.011    | 0.008  | 1  | 0.93     | 1.001   | 0.98                 | 1.022 |
| Duration                   | -0.197    | 0.034    | 33.879 | 1  | 5.87E-09 | 0.821   | 0.768                | 0.877 |
| Amount of smoking          | 0.086     | 0.116    | 0.547  | 1  | 0.46     | 1.089   | 0.868                | 1.367 |
| FEV1%                      | -0.015    | 0.007    | 3.908  | 1  | 0.048    | 0.985   | 0.971                | 1     |
| BMI                        | -0.005    | 0.031    | 0.025  | 1  | 0.874    | 0.995   | 0.936                | 1.058 |
| PC20                       | 0         | 0.011    | 0      | 1  | 0.998    | 1       | 0.978                | 1.022 |
| Atopy                      | -0.075    | 0.197    | 0.146  | 1  | 0.703    | 0.927   | 0.63                 | 1.366 |
| Blood eosinophil (% , log) | -0.012    | 0.015    | 0.669  | 1  | 0.414    | 0.988   | 0.959                | 1.017 |
| ΔFEV1                      | 0.01      | 0.01     | 1.006  | 1  | 0.316    | 1.01    | 0.991                | 1.029 |
| Age at asthma onset        | 0.005     | 0.011    | 0.211  | 1  | 0.646    | 1.005   | 0.984                | 1.026 |
| Total IgE (KU/L, log)      | -1.12E-05 | 1.00E-04 | 0.004  | 1  | 0.949    | 1       | 1                    | 1     |
| Cluster1                   |           |          | 1.245  | 3  | 0.742    |         |                      |       |
| Cluster2                   | -0.148    | 0.468    | 0.1    | 1  | 0.752    | 0.862   | 0.345                | 2.156 |
| Cluster3                   | 0.075     | 0.403    | 0.034  | 1  | 0.853    | 1.078   | 0.489                | 2.375 |
| Cluster4                   | 0.141     | 0.357    | 0.156  | 1  | 0.693    | 1.151   | 0.572                | 2.317 |
