# Supplementary material for: Clinical Characteristics of Exacerbation-Prone Adult Asthmatics Identified by Cluster Analysis
Source: PubMed Central journal article supplement — Allergy Asthma Immunol Res. 2017 Aug 8;9(6):483–90. doi: 10.4168/aair.2017.9.6.483 (PMC5603476; doi:10.4168/aair.2017.9.6.483), 2017-08-08
Supplement: aair-9-483-s004.pdf [file aair-9-483-s004.pdf]

**Supplementary Table S4.** Cellular profiles of the peripheral blood and sputum in the four clusters

| Cluster                                | Total                  | C1                   | C2                               | C3                                  | C4                   | P value |
|----------------------------------------|------------------------|----------------------|----------------------------------|-------------------------------------|----------------------|---------|
| Number of subjects                     | 259                    | 72                   | 48                               | 52                                  | 87                   |         |
| Peripheral blood                       |                        |                      |                                  |                                     |                      |         |
| WBC count (10 <sup>3</sup> /μL)        | 7.2 (3.4-23.1)         | 7 (3.7-23.1)*        | 7.4 (4.1-15.9)                   | 7.8 (4.1-21) <sup>†</sup>           | 6.5 (3.4-17)         | 0.006   |
| Eosinophils (%)                        | 4.8 (0-38.7)           | 5.1 (0-22.9)         | 4.9 (0-36)                       | 3.7 (0-27.7)                        | 5.3 (0-38.7)         | 0.172   |
| Neutrophils (%)                        | 53.5 (0.0-98.0)        | 53.7 (0-98)          | 50.1 (0-83.2)                    | 57.5 (0-93.3)                       | 53.2 (0-92.1)        | 0.218   |
| Neutrophil count                       | 3,794 (1400.4-16320.0) | 4,042.5 (1944-16320) | 3,777.4 (1580-7965) <sup>‡</sup> | 4,248.4 (1615.4-14616) <sup>‡</sup> | 3,642 (1400.4-11620) | 0.016   |
| Number of subjects                     | 86                     | 21                   | 17                               | 20                                  | 27                   |         |
| Sputum analysis                        |                        |                      |                                  |                                     |                      |         |
| Total cell count (10 <sup>5</sup> /mL) | 2.6 (0.3-200)          | 3 (1-26)             | 2 (0.8-45)                       | 2.4 (0.3-24)                        | 2.7 (0.4-200)        | 0.729   |
| Macrophages (%)                        | 7.8 (0.0-96.7)         | 9.7 (0-96.7)         | 11.6 (0.2-44.9)                  | 5.7 (0-25.6)                        | 7.8 (0-56)           | 0.501   |
| Eosinophils (%)                        | 1.4 (0.0-91.6)         | 1.31 (0-79)          | 1 (0-91.6)                       | 3.56 (0-39)                         | 0.5 (0-43.3)         | 0.661   |
| Neutrophils (%)                        | 70.4 (0-100)           | 70.4 (3.2-96.2)      | 75.6 (5.9-99.7)                  | 71.1 (0-98)                         | 60.3 (0-100)         | 0.917   |
| Neutrophil count                       | 247.5 (13.0-400.0)     | 270 (13-385)         | 296 (17-399)                     | 245 (90-392)                        | 217 (77-400)         | 0.779   |
| Lymphocytes (%)                        | 0.5 (0.0-9.3)          | 0.3 (0-5.5)          | 1 (0-9.3)                        | 0.2 (0-8.2)                         | 0 (0-6.2)            | 0.377   |

WBC, white blood cell.

Data are presented as medians with ranges and were compared using the Kruskal-Wallis test.

$P < 0.05$  is regarded as significant. *Post-hoc* analysis was performed: \*C1 and C3 ( $P < 0.05$ ); <sup>†</sup>C2 and C3 ( $P < 0.05$ ); <sup>‡</sup>C3 and C4 ( $P < 0.05$ ).
