# Supplementary material for: Clinical Characteristics of Exacerbation-Prone Adult Asthmatics Identified by Cluster Analysis
Source: PubMed Central journal article supplement — Allergy Asthma Immunol Res. 2017 Aug 8;9(6):483–90. doi: 10.4168/aair.2017.9.6.483 (PMC5603476; doi:10.4168/aair.2017.9.6.483), 2017-08-08
Supplement: aair-9-483-s007.pdf [file aair-9-483-s007.pdf]

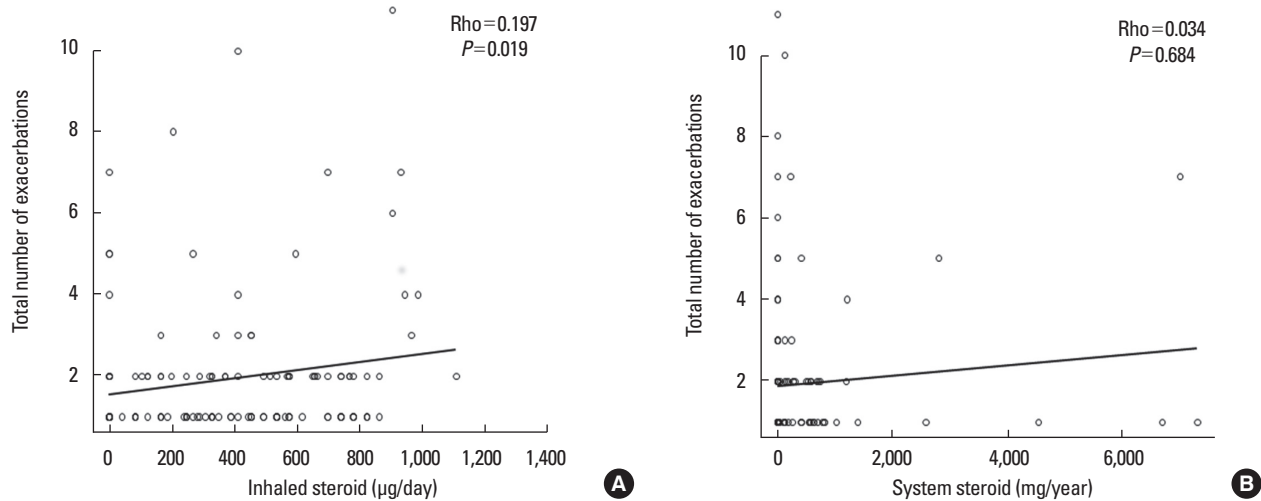

**Supplementary Fig. 3.** Correlations between the total number of exacerbations and corticosteroid dosage. (A) Inhaled corticosteroids (Spearman's  $\rho=0.197$ ,  $P=0.019$ ) and (B) systemic corticosteroids (Spearman's  $\rho=0.034$ ,  $P=0.684$ ).
