# Supplementary figures and images for: Clinical Characteristics of Exacerbation-Prone Adult Asthmatics Identified by Cluster Analysis
Source: PubMed Central journal article supplement — Allergy Asthma Immunol Res. 2017 Aug 8;9(6):483–90. doi: 10.4168/aair.2017.9.6.483 (PMC5603476; doi:10.4168/aair.2017.9.6.483), 2017-08-08

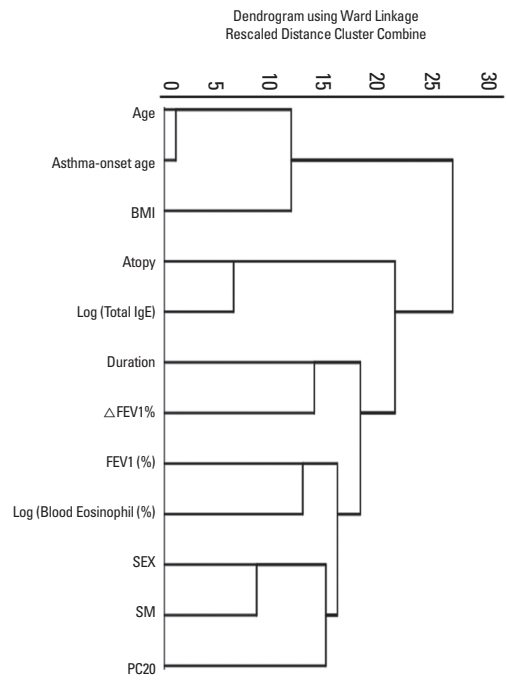

**Supplementary Fig. 1.** Dendrogram obtained using the 12 parameters.

Supplement: aair-9-483-s005.pdf [file aair-9-483-s005.pdf]

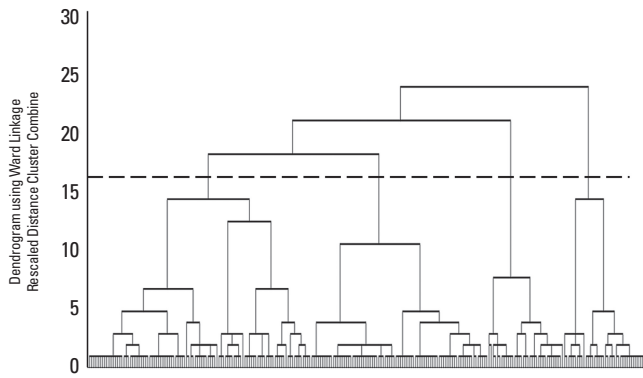

**Supplementary Fig. 2.** Hierarchical clustering using the 12 parameters.

Supplement: aair-9-483-s006.pdf [file aair-9-483-s006.pdf]
